# Supplementary material
Source: publisher figshare collection journal article supplement (https://gsajournals.figshare.com/ndownloader/files/25333760)
Supplement: Supplementary file 1 [file 25333760]

## Sheet: RNA DE >=2-fold increased
GO term description	Gene ratio	Background ratio	p value	padj value	Gene count	Gene names
carbohydrate metabolic process (GO:0005975)	49/485	62/1062	3.39375e-08	2.47744e-06	49	HXK1,SKN1,GPM2,XKS1,AMS1,AFL1,MAL2,CPH1,HSP21,HEX1,EXG2,GPD2,TPI1,C1_11080W,NTH1,GLK4,TDH3,GAC1,HSP104,C3_07490W,TPS1,C1_01360C,PHO15,C1_14060W,GPM1,FBA1,C1_14190C,C3_06860C,NAG1,PHR1,PFK1,CDC19,C4_02620C,FBP1,GPH1,PGK1,PGI1,RHR2,ENO1,PGA4,ATC1,GLK1,C1_02680C,C3_01820W,PFK2,TPS2,DAK2,GSY1,HXK2
interspecies interaction between organisms (GO:0044419)	63/485	89/1062	5.12028e-07	1.68058e-05	63	HMS1,HWP1,ECE1,HXK1,SKN7,HYR1,HSP90,RBT1,SLK19,LIG4,SET3,PST1,SOD1,CSH1,ALS3,RVS161,PLD1,CPH1,CNH1,HGC1,HSP21,IRO1,NAG6,DAC1,SOD5,HEX1,CR_08300C,CDC11,TPI1,BRG1,TDH3,HSP104,RBT4,TPS1,CTA4,AAF1,GPM1,UME6,FBA1,UBI4,HIS4,DEF1,GYP1,ALS2,HSP70,YHB1,NAG1,PHR1,CDC19,SUN41,IRS4,PGK1,EAP1,RHR2,ENO1,ATC1,RFX2,PGA7,BNI1,ADH1,TPS2,ALS7,ALS9
response to stress (GO:0006950)	100/485	157/1062	6.90649e-07	1.68058e-05	100	HMS1,SKN7,CR_03340C,DDR48,HSP90,MPH1,C4_00030C,C2_07070W,LIG4,FCY2,RAD3,SET3,PST1,FRP1,C5_04790C,SOD1,EAF6,C2_10850C,RVS161,MAL2,PLD1,CPH1,SGT2,FGR32,CNH1,CR_00060C,HSP21,RCA1,C6_04470C,C4_06740C,CSM3,DAC1,DCK1,PSF2,C6_03320W,FGR34,WSC2,SOD5,RDH54,BNA4,CDR2,TPI1,CZF1,BRG1,IML2,C4_07220C,CAS4,NTH1,WSC4,C1_07260C,GAC1,HSP104,CCS1,TPS1,HMX1,C4_00460C,GPX2,AUT7,RAD53,UME6,FGR38,UBI4,C5_02690W,UPC2,VR…
cell wall (GO:0005618)	42/485	56/1062	4.57357e-06	8.34676e-05	42	HWP1,ECE1,HYR1,DDR48,HSP90,RBT1,GPM2,CSH1,ALS3,SRB1,RBR3,PLB5,SOD5,PGA59,EXG2,CDC11,TPI1,RBT5,ECM331,TDH3,HYR3,GPM1,FBA1,ALS2,HSP70,PHR1,AHP1,CDC19,SUN41,HEM13,GPH1,PGK1,EAP1,ENO1,PGA4,ATC1,PDC11,GLX3,XYL2,ADH1,ALS7,ALS9
extracellular region (GO:0005576)	38/485	53/1062	7.68091e-05	0.00112141	38	ECE1,HYR1,HSP90,RBT1,ADH2,SOD1,ALS3,MAL2,GOR1,GRP2,PLB5,SOD5,HEX1,UGA1,TPI1,RBT5,TDH3,RBT4,GPM1,RIB3,ALS2,HSP70,PHR1,NIT3,SUN41,C2_07630C,HEM13,PGK1,PGI1,ENO1,PGA4,ATC1,C1_03510C,PDC11,NCR1,GLX3,MSB2,ADH1
pathogenesis (GO:0009405)	45/485	68/1062	0.000351239	0.0042734	45	HMS1,HWP1,ECE1,HXK1,SKN7,HSP90,RBT1,SLK19,LIG4,SET3,PST1,SOD1,CSH1,ALS3,RVS161,PLD1,CPH1,CNH1,HSP21,IRO1,NAG6,DAC1,SOD5,HEX1,CR_08300C,CDC11,BRG1,HSP104,RBT4,TPS1,UME6,UBI4,GYP1,ALS2,YHB1,NAG1,PHR1,SUN41,IRS4,RHR2,ATC1,RFX2,PGA7,BNI1,TPS2
filamentous growth (GO:0030447)	70/485	118/1062	0.00112148	0.0104909	70	HMS1,HWP1,HXK1,SKN7,DDR48,HSP90,LIG4,FCY2,SET3,SOD1,ALS3,RVS161,MAL2,PLD1,CPH1,FGR32,HGC1,HSP21,RCA1,IRO1,DAC1,DCK1,FGR34,PGA59,PIKA,BNA4,CDC11,GRR1,TPI1,CZF1,BRG1,C5_00800C,CAS4,CHA1,TPS1,CTA4,AAF1,ZCF39,RAD53,UME6,FGR38,C1_14190C,UBI4,DEF1,VRP1,GYP1,ALS2,YHB1,C7_03480W,SGS1,HEX3,NAG1,SLA1,PHR1,FGR51,ERG1,MHP1,FAB1,CDC19,HGT1,SUN41,KIP4,IRS4,SRB9,PGI1,ENO1,RFX2,BNI1,MSB2,TPS2
biofilm formation (GO:0042710)	27/485	38/1062	0.00114968	0.0104909	27	HWP1,ECE1,HYR1,CSH1,ALS3,CPH1,HGC1,QDR1,PIKA,CZF1,BRG1,RBT5,CAS4,HSP104,ZCF39,ADH5,DEF1,ALS2,PHR1,SUN41,EAP1,SRB9,RHR2,PGA7,ADH1,ALS7,ALS9
cell wall organization (GO:0071555)	25/485	35/1062	0.00156809	0.0127189	25	HWP1,RBT1,SLK19,SOD1,RVS161,CPH1,RCA1,QDR1,DCK1,WSC2,PGA59,CAS4,C1_14060W,C1_12430W,BPH1,PHR1,CMK1,MHP1,SUN41,IRS4,TUS1,PGA4,CR_09340W,MSB2,TPS2
cell adhesion (GO:0007155)	14/485	18/1062	0.00543992	0.0397114	14	HWP1,CSH1,ALS3,RBT5,TDH3,AAF1,HIS4,DEF1,ALS2,PHR1,EAP1,RHR2,ALS7,ALS9
vesicle-mediated transport (GO:0016192)	27/485	42/1062	0.0103439	0.068646	27	ECM21,ALS3,RVS161,FGR32,SEC6,C2_09710C,DDI1,PIKA,CR_01770C,ERV25,C5_03140C,RBT5,GDI1,GLO3,C7_04240C,AUT7,C4_00070C,VRP1,GYP1,SLA1,PGA63,SEC24,PAN1,KIP4,UFE1,SEC10,C1_10840C
oxidoreductase activity (GO:0016491)	56/485	100/1062	0.0192124	0.116875	56	C2_07270W,C7_03200C,C2_07070W,ADH2,PST1,FRP1,SOD1,CSH1,DLD2,C7_01170C,GOR1,GRP2,C4_00260W,SOD5,BNA4,AYR2,GPD2,C2_01540W,C5_00800C,RNR22,UGA2,RIB5,RNR21,IFE2,TDH3,SUR2,POX1,HMX1,GPX2,ADH5,PDX3,HIS4,HEM14,C5_02690W,C3_06860C,YHB1,OYE32,DES1,C1_01190C,C4_02040W,AHP1,DOT5,C6_04410C,ERG1,URA1,SCS7,HEM13,OSM1,C1_00630W,C7_04310C,C1_10840C,MAE1,GCV2,XYL2,ADH1,CBP1
cell cortex (GO:0005938)	20/485	31/1062	0.0252907	0.131873	20	C3_06610W,C1_07440W,C1_10090C,CR_07190W,RVS161,BNR1,SEC6,C2_09710C,NAG6,BBC1,ABP1,CDC11,GRR1,CAS4,VRP1,C7_03480W,SLA1,PAN1,SEC10,BNI1
cytoskeleton (GO:0005856)	20/485	31/1062	0.0252907	0.131873	20	C3_06610W,C1_10090C,CR_07220C,RVS161,BNR1,C2_09710C,C1_00570C,C4_07080C,BBC1,ABP1,CDC11,GRR1,C1_14060W,KIN3,VRP1,SLA1,MHP1,PAN1,KIP4,BNI1
cellular homeostasis (GO:0019725)	26/485	43/1062	0.0336129	0.163583	26	HXK1,SFU1,FRP1,GEF2,SOD1,ALS3,CNH1,IRO1,SMF3,RBT5,GLK4,CCS1,HMX1,C1_14190C,ZSF1,OYE32,HRK1,AHP1,DOT5,PFK1,CRP1,FAB1,GLK1,PFK2,HXK2,CUP1
protein catabolic process (GO:0030163)	20/485	32/1062	0.0392527	0.179091	20	C2_10850C,HRT1,CDC34,C6_04470C,C4_06740C,CR_08650C,CUE5,DDI1,GRR1,TOM1,C4_04660C,C4_00070C,C1_14470W,RAD16,C3_06560W,HEX3,MCA1,SEC61,CR_09340W,TIP120
lipid binding (GO:0008289)	15/485	23/1062	0.0454106	0.194999	15	C1_07440W,RVS161,C5_04050W,PLD1,SPO72,C5_05440C,CDC11,RBT4,AUT7,C1_12430W,C7_03480W,CR_01720W,FAB1,TUS1,CBP1
protein binding (GO:0005515)	57/485	106/1062	0.0483977	0.19628	57	CR_07230W,C6_02280W,HMS1,C3_06610W,HWP1,HYR1,HSP90,ECM21,PCL7,SET3,C3_01800C,C1_10090C,CR_07220C,ALS3,HRT1,RVS161,FGR32,BNR1,SEC6,C4_06740C,CPR6,CUE5,ABP1,DDI1,GRR1,GPD2,C5_03140C,TDH3,GAC1,HSP104,C4_00460C,GPM1,C1_12430W,C1_00210C,FBA1,LPI9,PEX5,VRP1,HSP70,C7_03480W,HEX3,SLA1,SEC12,KIP4,UFE1,PGK1,EAP1,SRB9,TUS1,ENO1,C7_01650W,TIP120,C7_00340C,BUB3,BNI1,C4_02340W,ADH1
site of polarized growth (GO:0030427)	22/485	37/1062	0.0612459	0.235313	22	C3_06610W,CR_07190W,BNR1,SEC6,ZDS1,WSC2,ABP1,CDC11,GRR1,CAS4,C1_14060W,VRP1,C7_03480W,SLA1,PAN1,KIP4,C1_08540C,TUS1,C2_08860W,BNI1,MSB2,RHO2
lyase activity (GO:0016829)	10/485	15/1062	0.0833428	0.304201	10	SNZ1,C4_03200C,C3_06280W,CHA1,FBA1,RIB3,ENO1,PDC11,ARO10,GLX3
response to chemical (GO:0042221)	77/485	151/1062	0.0919059	0.314979	77	HMS1,SKN7,SFU1,DDR48,HSP90,C2_07070W,FCY2,PST1,SOD1,C3_01800C,C2_10850C,PLD1,CPH1,CDR11,HGC1,HSP21,RCA1,C7_01170C,C4_06740C,NAG6,CR_08650C,DAC1,QDR1,C6_03320W,SOD5,DDI1,C2_00770W,TPO3,CDR2,GRR1,IML2,C5_00800C,CAS4,NTH1,HSP104,RBT4,CCS1,TPS1,HMX1,CTA4,LEU4,AUT7,RAD53,UME6,C1_14190C,C5_02690W,UPC2,C3_06860C,HSP70,YHB1,PHR1,CMK1,AHP1,DOT5,PPH3,ERG1,FAB1,HGT1,C2_02920W,MCA1,SEC61,C1_08540C,SRB9,LAP3,…
peptidase activity (GO:0008233)	12/485	19/1062	0.0949251	0.314979	12	C2_10850C,PRD1,DDI1,C4_04660C,C4_00070C,C6_04650W,C1_14470W,ECM38,MCA1,LAP3,C6_03960W,C4_02340W
enzyme regulator activity (GO:0030234)	18/485	31/1062	0.110802	0.351676	18	CR_07190W,CR_02910W,C1_14350W,HGC1,ZDS1,C1_00570C,GDI1,GLO3,GAC1,CCS1,C7_04240C,C1_14190C,LPI9,GYP1,SEC12,C1_08540C,C4_02340W,DAP1
hydrolase activity (GO:0016787)	64/485	126/1062	0.128287	0.390208	64	DDR48,HSP90,MPH1,RAD3,SNZ1,C2_10850C,AMS1,AFL1,MAL2,PLD1,CDR11,CR_00060C,C3_07910W,C3_07920W,PRD1,HYU1,NAG6,PLB5,DAC1,HEX1,CR_08300C,HMI1,RDH54,DDI1,EXG2,CDR2,C4_04660C,NTH1,HSP104,TPS1,C4_00460C,PHO15,C1_14060W,CAF16,C4_00070C,HIS4,C6_04650W,C1_14470W,C3_00400C,RAD16,SGS1,ECM38,C4_06860C,NAG1,PHR1,NIT3,PPH3,FBP1,SUN41,SNO1,KIP4,MCA1,RHR2,C4_03020W,LAP3,C6_03960W,ATC1,C7_01650W,C6_02580W,C3_01820…
cytokinesis (GO:0000910)	7/485	11/1062	0.184533	0.538836	7	RVS161,CDC11,KIN3,VRP1,PAN1,BNI1,C2_08960C
cellular bud (GO:0005933)	15/485	28/1062	0.254474	0.685487	15	C3_06610W,BNR1,SEC6,ZDS1,WSC2,CDC11,GRR1,CAS4,VRP1,C7_03480W,PHR1,KIP4,C1_08540C,TUS1,BNI1
cytoskeleton organization (GO:0007010)	15/485	28/1062	0.254474	0.685487	15	C3_06610W,CR_07190W,RVS161,BNR1,C2_09710C,BBC1,ABP1,CDC11,C1_12430W,KIN3,VRP1,SLA1,PAN1,BNI1,RHO2
DNA metabolic process (GO:0006259)	24/485	47/1062	0.270385	0.685487	24	CR_03340C,DDR48,HSP90,MPH1,C4_00030C,LIG4,RAD3,C5_04790C,EAF6,CR_00060C,CSM3,PSF2,HMI1,RDH54,C4_07220C,C1_07260C,C4_00460C,RAD53,RAD16,SGS1,HEX3,PPH3,CDC13,CR_10000C
cell development (GO:0048468)	9/485	16/1062	0.272317	0.685487	9	SKN7,PLD1,QDR1,CDC11,GRR1,NTH1,TPS1,PGI1,PGA4
signal transduction (GO:0007165)	21/485	42/1062	0.337301	0.820767	21	HMS1,SKN7,HSP90,CR_07190W,RVS161,CPH1,C6_04470C,DCK1,C6_03320W,WSC2,GDI1,AUT7,C1_12430W,KIN3,SYG1,PPH3,FAB1,IRS4,TUS1,MSB2,RHO2
plasma membrane (GO:0005886)	48/485	100/1062	0.348936	0.821689	48	HYR1,HSP90,SLK19,C1_07440W,PST1,GEF2,C5_04050W,SRB1,CNH1,C4_06740C,QDR1,DCK1,C3_01540W,DDI1,TPO3,NPR1,SMF3,EXG2,BNA4,CDR2,ERV25,RBT5,ECM331,TDH3,HMX1,C1_12430W,C1_00210C,FBA1,UBI4,SYG1,HSP70,ZRT2,PHR1,ERG1,CRP1,CDC19,HGT1,SEC61,C1_08540C,PGK1,EAP1,ENO1,PGA4,C2_08860W,HGT6,PDC11,MSB2,ADH1
regulation of biological process (GO:0050789)	123/485	263/1062	0.366099	0.835164	123	C6_02280W,HMS1,HXK1,SKN7,CTA2,CR_03340C,SFU1,HSP90,MPH1,C4_00030C,PCL7,CR_02930W,RAD3,SET3,PST1,SOD1,C3_01800C,C1_10090C,CR_07190W,CR_02910W,RVS161,AFL1,CPH1,C1_14350W,SEC6,HGC1,CR_00060C,ZDS1,RCA1,C6_04470C,CSM3,C1_00570C,C4_00260W,NAT4,DCK1,C6_03320W,ZCF38,WSC2,RFX1,CR_08300C,BBC1,ABP1,DDI1,NPR1,CDC11,GRR1,TPI1,CZF1,BRG1,C1_09320C,C4_07220C,CAS4,CTA24,C1_11080W,GDI1,C1_07260C,TDH3,GAC1,TPS1,CTA…
hyphal growth (GO:0030448)	8/485	16/1062	0.45847	1	8	HXK1,CDC11,GYP1,ALS2,SLA1,SRB9,PGI1,BNI1
generation of precursor metabolites and energy (GO:0006091)	22/485	48/1062	0.548052	1	22	HXK1,GPM2,ADH2,TPI1,TDH3,GAC1,C1_01360C,GPM1,FBA1,C1_14190C,RIB3,PFK1,CDC19,GPH1,PGK1,PGI1,ENO1,GLK1,PDC11,PFK2,GSY1,HXK2
phosphatase activity (GO:0016791)	8/485	17/1062	0.548481	1	8	AFL1,TPS1,PHO15,PPH3,FBP1,RHR2,C7_01650W,TPS2
protein folding (GO:0006457)	7/485	15/1062	0.569266	1	7	HSP90,CPR6,HSP104,C1_00210C,HSP70,C1_01190C,GLX3
protein kinase activity (GO:0004672)	7/485	15/1062	0.569266	1	7	NPR1,RAD53,KIN3,HRK1,CMK1,C1_08540C,C2_08860W
cell cycle (GO:0007049)	34/485	75/1062	0.570484	1	34	C6_02280W,CR_03340C,MPH1,C4_00030C,C5_04790C,HRT1,RVS161,CDC34,PLD1,HGC1,CSM3,QDR1,PSF2,RDH54,CDC11,GRR1,TOM1,C4_07220C,NTH1,GAC1,TPS1,C4_00460C,RAD53,C1_14190C,KIN3,VRP1,SGS1,PPH3,PAN1,MUM2,PGA4,BUB3,BNI1,C2_08960C
helicase activity (GO:0004386)	8/485	18/1062	0.631654	1	8	MPH1,RAD3,CR_00060C,HMI1,RDH54,C4_00460C,RAD16,SGS1
vitamin metabolic process (GO:0006766)	6/485	14/1062	0.682283	1	6	SNZ1,RIB5,PDX3,RIB3,C4_02040W,SNO1
DNA binding (GO:0003677)	33/485	76/1062	0.700275	1	33	HMS1,SKN7,CR_03340C,SFU1,MPH1,C4_00030C,LIG4,RAD3,CR_09050C,CPH1,CIRT4B,RCA1,C4_00260W,ZCF38,RFX1,RDH54,CZF1,BRG1,C4_07220C,C1_07260C,CTA4,C4_00460C,C3_07630C,RAD53,UPC2,RAD16,WOR3,CR_10000C,LAP3,MSN4,MNL1,RFX2,C7_01650W
Golgi apparatus (GO:0005794)	7/485	17/1062	0.730312	1	7	C6_04470C,PRD1,PIKA,NPR1,STV1,GLO3,GYP1
isomerase activity (GO:0016853)	7/485	17/1062	0.730312	1	7	GPM2,CPR6,TPI1,C3_07490W,GPM1,NAG1,PGI1
vacuole (GO:0005773)	12/485	29/1062	0.743783	1	12	AMS1,PRD1,C3_06710W,C2_10870W,TPO3,SMF3,AUT7,FAB1,SEC61,ENO1,ATC1,NCR1
cell budding (GO:0007114)	5/485	13/1062	0.788034	1	5	CAS4,C3_00400C,VRP1,PAN1,BNI1
lipid metabolic process (GO:0006629)	21/485	51/1062	0.788812	1	21	ALG9,PLD1,ERG10,PLB5,CR_08300C,PIKA,BMT6,ARE2,SUR2,MUQ1,POX1,PEX5,C3_00400C,UPC2,DES1,ERG1,FAB1,SCS7,C1_08540C,NCR1,DAP1
membrane (GO:0016020)	103/485	237/1062	0.801795	1	103	CR_03620C,MAL31,HYR1,HSP90,SKN1,SLK19,FCY2,C1_07440W,PST1,GEF2,ALG9,CR_02910W,C2_10850C,AMS1,RVS161,C5_04050W,PLD1,FGR32,SRB1,SPO72,CDR11,CNH1,DLD2,C6_04470C,C4_06740C,C3_06710W,NAG6,CR_08650C,QDR1,DCK1,C2_10870W,C6_04550C,C1_08800W,C3_01540W,DDI1,TPO3,NPR1,SMF3,EXG2,BNA4,CDC11,CR_01770C,CDR2,ERV25,C5_03140C,STV1,RBT5,IHD1,GLO3,WSC4,ECM331,ARE2,TDH3,SUR2,PEX19,CCS1,HMX1,CR_07480W,AUT7,C1_12430W,B…
peroxisome (GO:0005777)	4/485	11/1062	0.822175	1	4	POX1,PEX19,UBI4,PEX5
chromosome (GO:0005694)	24/485	60/1062	0.851125	1	24	C6_02280W,SKN7,MPH1,C4_00030C,LIG4,CR_02930W,SET3,C5_04790C,CR_00060C,RCA1,CSM3,PSF2,RFX1,BRG1,C4_07220C,CTA24,C1_07260C,C4_00460C,SGS1,HEX3,PPH3,CDC13,C1_08540C,BUB3
endomembrane system (GO:0012505)	38/485	93/1062	0.86084	1	38	C1_07440W,ALG9,C2_10850C,PLD1,FGR32,C6_04470C,PRD1,C4_06740C,NAG6,CR_08650C,C1_08800W,CR_08300C,PIKA,NPR1,C5_03140C,STV1,GLO3,WSC4,ARE2,SUR2,PEX19,HMX1,C1_00210C,GYP1,SLA1,PGA63,C1_01190C,ERG1,SEC12,FAB1,SEC24,UFE1,SEC61,C1_10840C,CR_09340W,C7_00340C,BNI1,DAP1
endoplasmic reticulum (GO:0005783)	14/485	38/1062	0.900209	1	14	C1_07440W,ALG9,C4_06740C,NAG6,CR_08300C,C5_03140C,ARE2,PEX19,HMX1,ERG1,SEC24,UFE1,SEC61,CR_09340W
ligase activity (GO:0016874)	4/485	13/1062	0.916162	1	4	LIG4,CDC34,C6_00390W,CR_09340W
transport (GO:0006810)	73/485	178/1062	0.92675	1	73	HXK1,MAL31,ECM21,FCY2,C1_07440W,FRP1,GEF2,C1_10090C,CR_02910W,CR_07220C,ALS3,RVS161,SGT2,FGR32,SPO72,CDR11,SEC6,CNH1,ZDS1,C2_09710C,C3_06710W,NAG6,QDR1,C6_04550C,DDI1,PIKA,TPO3,NPR1,SMF3,CDC11,CR_01770C,CDR2,ERV25,C5_03140C,STV1,RBT5,TOM1,GDI1,GLO3,WSC4,TDH3,PEX19,CCS1,C7_04240C,CR_07480W,AUT7,C4_00070C,BPH1,FBA1,PEX5,VRP1,GYP1,HSP70,ZRT2,YHB1,C3_06560W,SLA1,PGA63,CRP1,SEC24,HGT1,PAN1,KIP4,UFE1,S…
nucleus organization (GO:0006997)	3/485	11/1062	0.94115	1	3	TOM1,PGA63,CR_01720W
transferase activity (GO:0016740)	64/485	160/1062	0.950746	1	64	HXK1,PSA2,C2_07070W,XKS1,ADH2,ALG9,EAF6,HRT1,CDC34,AFL1,C1_14500C,ERG10,SRB1,C6_04470C,CR_08650C,NAT4,UGA1,PIKA,NPR1,GRR1,BMT6,TOM1,C1_11080W,RIB5,GLK4,ARE2,MUQ1,TPS1,C1_01360C,LEU4,RAD53,C3_06490W,KIN3,BAT21,C5_02690W,C3_00400C,RAD16,HEX3,HRK1,PHR1,C6_00210W,CMK1,C6_04410C,PFK1,FAB1,CDC19,C4_02620C,GPH1,C1_08540C,PGK1,ENO1,PGA4,C2_08860W,CR_09340W,CTM1,GLK1,ARO8,XYL2,PFK2,ADH1,DAK2,GSY1,HXK2,C4_…
growth of unicellular organism as a thread of attached cells (GO:0070783)	4/485	15/1062	0.963022	1	4	CPH1,CDC11,GRR1,CTA4
response to drug (GO:0042493)	28/485	78/1062	0.973244	1	28	SKN7,HSP90,RCA1,C7_01170C,NAG6,DDI1,C2_00770W,TPO3,CDR2,GRR1,CAS4,RBT4,HMX1,LEU4,UME6,C1_14190C,UPC2,YHB1,PHR1,PPH3,ERG1,HGT1,PGA4,MSN4,MNL1,ATC1,C2_10540W,ALS9
transporter activity (GO:0005215)	21/485	65/1062	0.99155	1	21	MAL31,FCY2,C1_07440W,GEF2,CDR11,CNH1,C3_06710W,QDR1,C6_04550C,TPO3,SMF3,CDR2,STV1,WSC4,ZRT2,CRP1,HGT1,SEC61,GIT2,HGT6,C7_00340C
nucleotidyltransferase activity (GO:0016779)	3/485	17/1062	0.996716	1	3	PSA2,SRB1,MUQ1
organelle organization (GO:0006996)	64/485	175/1062	0.996958	1	64	CR_07230W,C3_06610W,CR_03340C,CR_03620C,HSP90,C4_00030C,CR_02930W,RAD3,SET3,C5_04790C,EAF6,CR_07190W,CR_02910W,RVS161,C1_14500C,FGR32,BNR1,SPO72,CR_00060C,ZDS1,C4_06740C,CSM3,C2_09710C,C4_00260W,NAG6,NAT4,DCK1,HMI1,BBC1,ABP1,RDH54,CDC11,C5_03140C,TOM1,C4_07220C,GLO3,C1_07260C,HSP104,PEX19,C4_00460C,AUT7,C3_07630C,C1_12430W,KIN3,PEX5,VRP1,RAD16,SGS1,HEX3,SLA1,PGA63,CR_01720W,FAB1,SEC24,PAN1,CDC13,…
cellular protein modification process (GO:0006464)	28/485	89/1062	0.998472	1	28	RAD3,SET3,ALG9,EAF6,CDC34,SRB1,C6_04470C,CPR6,C1_00570C,C4_00260W,NAT4,NPR1,GRR1,TOM1,C4_04660C,PHO15,RAD53,UBI4,KIN3,C1_14470W,HEX3,HRK1,CMK1,PPH3,C1_08540C,C2_08860W,CTM1,C4_05250W
mitochondrial envelope (GO:0005740)	13/485	58/1062	0.999956	1	13	CR_03620C,SOD1,C2_10850C,DLD2,PRD1,CCS1,C1_14060W,GPM1,PDX3,RIB3,HEM14,URA1,C4_03020W
mitochondrion (GO:0005739)	35/485	124/1062	0.999992	1	35	HXK1,CR_03620C,C5_00030W,C1_07440W,SOD1,C4_03200C,C2_10850C,C3_06280W,DLD2,PRD1,DCK1,HMI1,TPI1,TDH3,CCS1,LEU4,C1_14060W,GPM1,PDX3,FBA1,BAT21,RIB3,HEM14,YHB1,PFK1,URA1,C6_00390W,PGK1,PGI1,C4_03020W,ENO1,MAE1,PFK2,ADH1,HXK2
cellular respiration (GO:0045333)	1/485	21/1062	0.999998	1	1	RIB3
cytoplasm (GO:0005737)	147/485	408/1062	1	1	147	C3_06610W,HXK1,SKN7,CR_03620C,HSP90,C5_00030W,C1_07440W,SNZ1,ADH2,SOD1,ALG9,C4_03200C,C1_10090C,CR_07190W,CR_02910W,CR_07220C,CSH1,C2_10850C,HRT1,AMS1,RVS161,CDC34,PLD1,ERG10,SGT2,SRB1,BNR1,SPO72,C3_06280W,SEC6,HGC1,ZDS1,RCA1,DLD2,C6_04470C,PRD1,C4_06740C,CPR6,C2_09710C,C3_06710W,NAG6,DCK1,C2_10870W,C3_02160C,CR_08300C,HMI1,BBC1,ABP1,UGA1,PIKA,TPO3,NPR1,SMF3,CDC11,GRR1,GPD2,ERV25,C5_03140C,STV1,T…
nucleus (GO:0005634)	77/485	269/1062	1	1	77	CR_07230W,C6_02280W,HXK1,SKN7,CR_03340C,MPH1,C4_00030C,LIG4,CR_02930W,RAD3,SET3,C5_04790C,SOD1,EAF6,C3_01800C,CR_07220C,HRT1,CDC34,PLD1,CPH1,CR_10060W,HGC1,CR_00060C,RCA1,CSM3,CR_08650C,PSF2,ZCF38,RFX1,RDH54,PIKA,GRR1,CZF1,BRG1,C4_07220C,CTA24,C1_07260C,RNR21,HSP104,CCS1,HMX1,CTA4,C4_00460C,AAF1,ZCF39,C3_07630C,RAD53,C1_14190C,KIN3,C1_14470W,ZSF1,UPC2,RAD16,WOR3,HSP70,SGS1,HEX3,C4_06860C,LYS142,S…
translation (GO:0006412)	3/485	52/1062	1	1	3	C5_00030W,C6_00390W,C2_02930C
structural molecule activity (GO:0005198)	4/485	60/1062	1	1	4	C5_00030W,CDC11,PGA63,MHP1
RNA binding (GO:0003723)	7/485	75/1062	1	1	7	C5_00030W,C2_07070W,TDH3,ZSF1,C2_07060W,LAP3,PFK2
ribosome (GO:0005840)	2/485	57/1062	1	1	2	C5_00030W,C2_10850C
nucleolus (GO:0005730)	3/485	75/1062	1	1	3	LIG4,C4_00460C,SGS1
ribosome biogenesis (GO:0042254)	2/485	111/1062	1	1	2	TOM1,C6_02580W
RNA metabolic process (GO:0016070)	16/485	162/1062	1	1	16	SKN7,RAD3,CR_10060W,C4_00260W,ZCF38,TOM1,CTA4,C3_07630C,C1_14470W,ZSF1,C6_00390W,C2_07630C,C2_07060W,MUM2,C7_01650W,C6_02580W

## Sheet: RNA DE>=2-fold decreased
GO term description	Gene ratio	Background ratio	p value	padj value	Gene count	Gene names
ribosome biogenesis (GO:0042254)	83/375	111/1062	3.11281e-19	2.30348e-17	83	RPS6A,CR_07030C,RPS27,NUP49,C4_03740W,UTP20,CSI2,C6_02230W,C7_03400C,C6_02380W,RPL7,C6_04180W,C1_07660W,YVH1,MRT4,CR_06450W,C4_05330C,CR_01780W,NIP7,C5_04910W,C2_09160W,C7_03850W,REI1,RRP42,NAN1,C4_05230C,DIM1,NOP15,UTP13,C3_04380C,C3_02350W,C2_01220W,TSR1,RPL17B,RRP6,C2_02540W,C1_04040C,ENP2,RPF2,NOP8,C1_02450C,NEP1,SDA1,UTP4,C1_03830C,RRP8,CIC1,C1_06760C,C2_04120C,SSF1,RPS7A,C4_05010W,C3_04370C…
RNA metabolic process (GO:0016070)	104/375	162/1062	3.27462e-16	1.21161e-14	104	RPS6A,RPC19,CR_07030C,PRP39,RPS27,RPM2,C4_03740W,SNU114,CR_02890C,C4_03730C,C6_03210C,C3_01110C,UTP20,CSI2,RPB4,C7_03400C,C1_12610W,C6_02380W,RPL7,C7_03840W,C1_07660W,ABP140,MRT4,CR_06450W,C4_05330C,CR_01780W,MED5,NIP7,PET127,C5_04910W,C2_09160W,C7_03850W,RRP42,NAN1,C4_05230C,SEN15,RPA190,C1_11160C,DIM1,NOP15,MRR1,UTP13,C3_04380C,C5_04990W,C3_02350W,TSR1,C6_02350C,RPL17B,RRP6,C2_02540W,C1_04040C,…
nucleolus (GO:0005730)	56/375	75/1062	6.23611e-13	1.53824e-11	56	RPC19,CR_07030C,UTP20,CSI2,C7_03400C,RPL7,C1_07660W,MRT4,CR_06450W,C4_05330C,C5_04910W,C2_09160W,C7_03850W,NAN1,RPA190,NOP15,UTP13,C3_04380C,C3_02350W,TSR1,RRP6,C2_02540W,C1_04040C,ENP2,RPF2,NOP8,NEP1,UTP4,RRP8,CIC1,C2_04120C,SSF1,C4_05010W,C3_04370C,RRS1,KRR1,ERB1,RPA12,NOG1,C1_06540C,PWP2,CR_10410C,NOP14,C1_04090C,C1_10620W,C1_12820C,ARX1,RLP24,C2_05750W,ENP1,C2_01070W,UTP21,C2_09660W,SPB1,C3_0…
RNA binding (GO:0003723)	51/375	75/1062	2.29694e-09	4.24933e-08	51	PRP39,CAM1,SNU114,CSI2,RPB4,C7_03400C,C1_12610W,C6_02380W,RPL7,C1_02430C,C1_02330C,NIP1,NIP7,RPL9B,NAN1,NOP15,UTP13,C3_04380C,C3_05290C,C6_02350C,C2_02540W,C1_04040C,RPG1A,RPF2,C4_03830W,C1_03830C,CIC1,PRT1,RPS42,C2_04120C,SSF1,RRS1,KRR1,C1_07960W,ERB1,C6_02690C,C5_03110C,TIF5,ELF1,CR_10410C,NOP14,C1_10620W,C2_02150C,C6_03380W,C5_01610W,C2_05750W,ENP1,MSS116,C3_05160C,C1_05420W,RPL39
structural molecule activity (GO:0005198)	42/375	60/1062	1.88937e-08	2.79627e-07	42	C2_05410W,YML6,RPS6A,RPS27,NUP49,C2_01320W,C2_05710C,C1_12280C,C1_08920W,IMG2,C7_03000C,C1_12610W,RPS22A,C1_02330C,MRP7,MRPL37,CR_08480C,RPL38,C3_01850W,C1_06470W,C5_04530W,C1_06070W,C1_03620C,C6_02370C,RPL9B,C3_07390C,C2_01740C,C2_01220W,RPL42,RPL17B,RPS25B,CIC1,RPS42,C7_01020C,RPS7A,C2_02270C,RPS30,NUP84,C4_03410W,MRP20,RPL37B,RPL39
ribosome (GO:0005840)	40/375	57/1062	3.84478e-08	4.7419e-07	40	C2_05410W,YML6,RPS6A,RPS27,C2_05710C,C1_12280C,C1_08920W,IMG2,C7_03000C,C6_02230W,C1_12610W,RPS22A,C1_02430C,C1_02330C,MRP7,MRPL37,CR_08480C,RPL38,C3_01850W,C1_06470W,C5_04530W,C1_06070W,C1_03620C,C6_02370C,RPL9B,C3_07390C,C2_01740C,RPL42,RPL17B,RPS25B,CIC1,RPS42,C7_01020C,RPS7A,C2_02270C,RPS30,C4_03410W,MRP20,RPL37B,RPL39
translation (GO:0006412)	36/375	52/1062	3.45523e-07	3.65267e-06	36	C2_05410W,YML6,RPS6A,RPS27,CAM1,RPM2,C2_05710C,CR_03950W,IMG2,C5_02590C,RPS22A,C1_02430C,C1_02330C,MRP7,CR_08480C,RPL38,NIP1,C1_06470W,C1_06070W,C1_03620C,RPL9B,C5_02660C,RPL42,RPL17B,RPG1A,CIC1,PRT1,C7_01020C,RPS7A,C2_02270C,RPS30,TIF5,C4_03410W,MRP20,RPL37B,RPL39
nucleus (GO:0005634)	120/375	269/1062	0.00016816	0.00155548	120	CM_00330W,RPC19,CR_07030C,PRP39,CAM1,GLE2,NUP49,RPM2,C4_03740W,SNU114,C2_01320W,CR_02890C,C6_03210C,WH11,C1_07690C,UTP20,CSI2,RPB4,C1_11790W,C7_03400C,RPL7,AHR1,ZCF1,C1_07660W,SRR1,YVH1,ECM22,MRT4,CR_06450W,URE2,C4_05330C,MED5,NIP7,C5_04910W,C2_09160W,RMT2,C7_03850W,RRP42,NAN1,C4_05230C,SEN15,RPA190,PPT1,NOP15,MRR1,C2_08160C,HAP41,UTP13,C3_04380C,SPC19,C5_04990W,C3_02350W,C2_01220W,TSR1,APN2,C6_0…
translation regulator activity (GO:0045182)	9/375	10/1062	0.000550784	0.00452867	9	CAM1,C6_01000C,C1_02430C,NIP1,RPG1A,PRT1,TIF5,C3_02420C,ELF1
mitochondrion (GO:0005739)	60/375	124/1062	0.000992191	0.00734221	60	CM_00320W,YML6,QCR8,CM_00330W,C1_06640C,C1_03940W,CM_00370W,CM_00170C,CM_00440W,CM_00140C,SAM51,RPM2,C4_03730C,C1_02290C,C6_03210C,CM_00310W,TIM10,CR_03950W,C1_12280C,C1_08920W,IMG2,C7_03000C,C5_02590C,CM_00160C,C1_12610W,C6_02380W,CM_00380W,COX7,C7_01440W,TOM70,MRP7,SRR1,MRPL37,C3_01850W,C5_04530W,C1_06070W,C6_02370C,MDM34,CR_00570W,PET127,CM_00050W,C3_07390C,C1_08930C,CSP37,C2_01740C,SAM50,C1_0…
nucleotidyltransferase activity (GO:0016779)	11/375	17/1062	0.0123223	0.0795311	11	RPC19,CR_02890C,C6_03210C,RPB4,GAL7,RPA190,C5_04990W,PRI2,RPA12,C1_12820C,C2_01070W
mitochondrial envelope (GO:0005740)	29/375	58/1062	0.0128969	0.0795311	29	CM_00320W,QCR8,CM_00330W,C1_06640C,C1_03940W,CM_00370W,CM_00170C,CM_00440W,CM_00140C,SAM51,CM_00310W,TIM10,C5_02590C,CM_00160C,CM_00380W,COX7,TOM70,MDM34,PET127,CM_00050W,C1_08930C,CSP37,SAM50,C3_01170W,QCR7,TOM6,C3_02420C,YNK1,TIM12
cellular respiration (GO:0045333)	12/375	21/1062	0.0322079	0.183337	12	CM_00320W,QCR8,CM_00330W,C1_03940W,CM_00370W,CM_00440W,CM_00310W,C5_02590C,CM_00380W,COX7,CM_00050W,QCR7
cytoplasm (GO:0005737)	155/375	408/1062	0.0844305	0.446276	155	C2_05410W,CM_00320W,YML6,C3_06950W,QCR8,C3_06970W,C2_06620W,CM_00330W,C1_06640C,RPS6A,C1_03940W,CM_00370W,CM_00170C,CM_00440W,RPS27,CAM1,GLE2,CAK1,CM_00140C,SAM51,RPM2,C4_03740W,FEN1,C2_01320W,C4_03730C,C1_02290C,C6_03210C,C2_05710C,C5_03120W,SSH1,CM_00310W,WH11,EMP70,TIM10,C6_02970C,CR_03950W,UTP20,C1_12280C,C1_08920W,MET18,IMG2,ERG25,C7_03000C,RPB4,C6_02230W,C5_02590C,C1_11790W,CM_00160C,PEX3,C…
transporter activity (GO:0005215)	25/375	65/1062	0.33585	1	25	PHO87,C1_06640C,OPT8,CM_00170C,CM_00140C,C1_07690C,TIM10,CM_00160C,OPT1,COX7,C3_05900W,TOM70,HGT14,FTR2,HGT10,NUP,SAM50,CTR1,VRG4,SNQ2,TOM6,ITR1,FRP3,C3_05380W,TIM12
nucleus organization (GO:0006997)	5/375	11/1062	0.339253	1	5	GLE2,FEN1,C2_08160C,C2_01220W,NUP84
response to drug (GO:0042493)	29/375	78/1062	0.403138	1	29	CR_01260W,UTP20,OPT1,AHR1,MRT4,NIP1,C5_04530W,HNM1,C7_03850W,C4_05230C,MRR1,RPL17B,RRP6,ENP2,RPG1A,RPF2,PRT1,C1_06760C,C4_05010W,RRS1,CCN1,ERB1,NOG1,ADA2,NOP14,DAG7,C3_05380W,RLP24,FET31
growth of unicellular organism as a thread of attached cells (GO:0070783)	6/375	15/1062	0.445786	1	6	CR_01260W,EMP70,AHR1,ECM22,C1_11160C,DSE1
transport (GO:0006810)	63/375	178/1062	0.521963	1	63	C3_06970W,C2_06620W,PHO87,C1_06640C,OPT8,CM_00170C,GLE2,NUP49,CM_00140C,SAM51,FEN1,SSH1,CR_01260W,EMP70,C1_07690C,TIM10,C6_02970C,RPB4,C6_02230W,CM_00160C,PEX3,OPT1,C5_04860C,C3_05900W,TOM70,YVH1,MRT4,MDM34,HGT14,REI1,FTR2,C2_08160C,HGT10,NUP,SAM50,C2_01220W,CTR1,C1_04040C,VRG4,C3_07130W,C1_02450C,SNQ2,C2_09970C,SDA1,C1_13130C,TOM6,C3_07170C,ITR1,RRS1,HMT1,FRE10,C3_03110W,NOG1,ELF1,NUP84,C7_00430…
Golgi apparatus (GO:0005794)	6/375	17/1062	0.591908	1	6	C2_06620W,OPT1,C1_10960W,C5_04860C,MNN11,VRG4
helicase activity (GO:0004386)	6/375	18/1062	0.656842	1	6	C7_03400C,C6_02380W,MSS116,C3_05160C,DBP3,C3_01560W
enzyme regulator activity (GO:0030234)	10/375	31/1062	0.704699	1	10	CAK1,C1_10960W,C4_05330C,C3_07170C,CCN1,C1_07960W,TIF5,C1_04090C,RLP24,C1_05420W
cell budding (GO:0007114)	4/375	13/1062	0.731017	1	4	REI1,C1_11160C,C3_07130W,ROT1
generation of precursor metabolites and energy (GO:0006091)	15/375	48/1062	0.773498	1	15	CM_00320W,QCR8,CM_00330W,C1_03940W,CM_00370W,CM_00440W,CM_00310W,C5_02590C,CM_00380W,COX7,CM_00050W,C1_08930C,C2_09970C,QCR7,SGA1
vitamin metabolic process (GO:0006766)	4/375	14/1062	0.788315	1	4	PAN6,SPE1,SPE2,HMT1
peroxisome (GO:0005777)	3/375	11/1062	0.807184	1	3	C6_02970C,PEX3,SRR1
transferase activity (GO:0016740)	52/375	160/1062	0.814783	1	52	RPC19,CM_00170C,OPI3,CAK1,CM_00140C,C7_02690C,FEN1,CR_02890C,C4_03730C,C6_03210C,DIE2,RPB4,C1_11790W,CM_00160C,MNN11,CHO2,ABP140,CR_06450W,URE2,C3_02180C,GAL7,CR_01780W,CR_00570W,CR_03760W,RMT2,RPA190,DIM1,BMT1,C5_04990W,AAT22,MET14,C4_03830W,NEP1,PRI2,RRP8,DBF2,C3_07170C,RHD1,ARG5,6,HMT1,TRM2,RPA12,C3_05300C,C1_09040C,RMS1,ADA2,C7_02340C,YNK1,C1_12820C,C2_01070W,FUN31,SPB1
cellular protein modification process (GO:0006464)	27/375	89/1062	0.873871	1	27	CAK1,DIE2,C5_03120W,C1_06390W,MNN11,YVH1,URE2,C3_02180C,GAL7,MED5,CR_03760W,RMT2,C1_11160C,PPT1,C4_01730C,BMT1,VRG4,DBF2,C3_07170C,ROT1,HMT1,C1_09040C,RMS1,ADA2,C1_04090C,TAF14,FUN31
isomerase activity (GO:0016853)	4/375	17/1062	0.90364	1	4	C6_02350C,PUS7,C1_10620W,C5_01610W
organelle organization (GO:0006996)	54/375	175/1062	0.925374	1	54	C1_06640C,RPS27,GLE2,SAM51,RPM2,FEN1,C1_02290C,NUO1,TIM10,C6_02970C,CSI2,C6_02230W,C5_00620W,PEX3,C6_02380W,TOM70,YVH1,CR_06450W,C4_05330C,C1_02300W,MED5,NIP7,MDM34,CR_03760W,C4_05230C,C2_08160C,SAM50,SPC19,C2_01220W,C3_01170W,RRP6,C2_02540W,RPF2,SDA1,QCR7,DBF2,C1_06760C,TOM6,ROT1,SSF1,C4_05010W,NHP6A,RRS1,C1_07960W,C1_09040C,C6_02690C,TIF5,C3_02420C,ADA2,NUP84,TAF14,C4_02720C,C6_03380W,TIM12
oxidoreductase activity (GO:0016491)	29/375	100/1062	0.934493	1	29	CM_00320W,QCR8,CM_00340W,CM_00330W,CYB5,C1_03940W,CM_00370W,CM_00440W,FAD3,CM_00310W,ERG25,CM_00380W,COX7,C1_01620C,URE2,C3_01850W,C5_04530W,CM_00050W,C1_08930C,C1_05190C,QCR7,MET8,C2_01630W,ARG5,6,FRE10,C6_02290C,FRE7,C7_00430W,FET31
lyase activity (GO:0016829)	3/375	15/1062	0.942431	1	3	SPE1,SPE2,MET8
protein kinase activity (GO:0004672)	3/375	15/1062	0.942431	1	3	CAK1,DBF2,FUN31
cytokinesis (GO:0000910)	2/375	11/1062	0.942772	1	2	C3_07130W,DBF2
lipid metabolic process (GO:0006629)	13/375	51/1062	0.953923	1	13	CYB5,FAD3,OPI3,C7_02690C,FEN1,C5_03120W,ERG25,PEX3,C1_10960W,CHO2,CR_00570W,RHD1,C3_05300C
cell development (GO:0048468)	3/375	16/1062	0.958351	1	3	YVH1,C3_07130W,C1_10620W
hyphal growth (GO:0030448)	3/375	16/1062	0.958351	1	3	VRG4,DBF2,CCN1
membrane (GO:0016020)	73/375	237/1062	0.95857	1	73	CM_00320W,C3_06950W,QCR8,CM_00340W,CM_00330W,PHO87,C1_06640C,CYB5,C1_03940W,CM_00370W,CM_00170C,CM_00440W,CM_00140C,C3_05280C,SAM51,C7_02690C,FEN1,DIE2,C5_03120W,SSH1,CR_01260W,C3_06420C,CM_00310W,WH11,EMP70,C6_02970C,ERG25,C5_02590C,CM_00160C,PEX3,CM_00380W,OPT1,COX7,C1_10960W,C5_04860C,C3_05900W,TOM70,MNN11,C4_05330C,RTA3,MDM34,HGT14,CM_00050W,C1_08930C,CSP37,FTR2,C2_08160C,HGT10,NUP,SAM50,C3_0…
plasma membrane (GO:0005886)	28/375	100/1062	0.958867	1	28	QCR8,PHO87,C1_03940W,SSH1,WH11,ERG25,OPT1,COX7,TOM70,RTA3,HGT14,CSP37,FTR2,HGT10,SAM50,CTR1,SNQ2,QCR7,C3_07170C,ITR1,FRE10,C3_03110W,ELF1,C7_00430W,FRP3,C3_05380W,C4_02720C,FET31
endoplasmic reticulum (GO:0005783)	9/375	38/1062	0.959135	1	9	FEN1,C5_03120W,SSH1,ERG25,PEX3,C5_04860C,MDM34,C2_08160C,ROT1
cytoskeleton organization (GO:0007010)	6/375	28/1062	0.965248	1	6	C1_02300W,SPC19,SDA1,DBF2,ROT1,C4_02720C
DNA binding (GO:0003677)	20/375	76/1062	0.968429	1	20	CM_00340W,CAM1,CR_02890C,C6_03210C,RPB4,AHR1,C3_07690C,STP4,RPA190,MRR1,HAP41,PRI2,C1_13820C,NHP6A,C1_07960W,RPA12,MET28,ADA2,C1_12820C,C2_01070W
phosphatase activity (GO:0016791)	3/375	17/1062	0.970075	1	3	C2_01860C,YVH1,PPT1
ligase activity (GO:0016874)	2/375	13/1062	0.97257	1	2	PAN6,C4_01730C
cell adhesion (GO:0007155)	3/375	18/1062	0.978632	1	3	AHR1,DSE1,ADA2
endomembrane system (GO:0012505)	24/375	93/1062	0.984694	1	24	C2_06620W,CYB5,GLE2,NUP49,FEN1,DIE2,C5_03120W,SSH1,EMP70,C1_07690C,ERG25,PEX3,OPT1,C1_10960W,C5_04860C,MNN11,MDM34,C2_08160C,C2_01220W,VRG4,C3_07130W,PRI2,ROT1,NUP84
protein folding (GO:0006457)	2/375	15/1062	0.987119	1	2	C1_02300W,ROT1
vacuole (GO:0005773)	5/375	29/1062	0.991446	1	5	C3_06950W,EMP70,C3_05900W,RTA3,SGA1
biofilm formation (GO:0042710)	7/375	38/1062	0.993921	1	7	CAK1,WH11,AHR1,DSE1,PGA26,ADA2,TAF14
vesicle-mediated transport (GO:0016192)	8/375	42/1062	0.994217	1	8	C2_06620W,FEN1,EMP70,C5_04860C,C2_08160C,C3_07130W,C3_07170C,C1_10620W
lipid binding (GO:0008289)	3/375	23/1062	0.996326	1	3	CAM1,ADA2,TIM12
peptidase activity (GO:0008233)	2/375	19/1062	0.997287	1	2	C1_06390W,C6_04180W
cellular homeostasis (GO:0019725)	7/375	43/1062	0.998643	1	7	C3_06950W,CR_01260W,EMP70,CRD2,HAP41,SNQ2,DBF2
cytoskeleton (GO:0005856)	4/375	31/1062	0.998935	1	4	ABP140,SPC19,NEP1,DBF2
protein binding (GO:0005515)	24/375	106/1062	0.998946	1	24	CAM1,C1_02290C,C1_07690C,TIM10,RPB4,PEX3,AHR1,ABP140,URE2,NIP1,C1_02300W,DSE1,SPC19,SUT1,ZPR1,CIC1,C3_07170C,ROT1,AMN1,RPA12,MET28,C5_03110C,TIF5,CR_10410C
chromosome (GO:0005694)	11/375	60/1062	0.99909	1	11	CM_00330W,C4_03740W,CR_06450W,NAN1,C4_05230C,SPC19,RRP6,PRI2,C1_06760C,TAF14,C6_03380W
protein catabolic process (GO:0030163)	4/375	32/1062	0.999254	1	4	C2_01320W,C1_06390W,CIC1,AMN1
regulation of biological process (GO:0050789)	72/375	263/1062	0.999359	1	72	PHO87,CAM1,GLE2,CAK1,RPM2,C4_03740W,C6_01000C,RPB4,C7_03400C,C5_00620W,C6_04180W,AHR1,ZCF1,C7_03840W,SRR1,YVH1,ECM22,MRT4,CR_06450W,URE2,C4_05330C,C1_02300W,STP4,MED5,RTA3,MDM34,CR_03760W,PET127,C5_04910W,NAN1,C4_05230C,MRR1,DSE1,HAP41,SPC19,C2_01220W,SUT1,RRP6,C3_07130W,ZPR1,SDA1,PGA26,UTP4,C1_03830C,DBF2,C1_06760C,C3_07170C,ARG5,6,HMT1,CCN1,C1_07960W,C3_03110W,AMN1,RPA12,MET28,C1_09040C,C6_0269…
signal transduction (GO:0007165)	6/375	42/1062	0.999507	1	6	SRR1,YVH1,C3_07130W,DBF2,C3_07170C,C4_02720C
DNA metabolic process (GO:0006259)	7/375	47/1062	0.999618	1	7	C5_00620W,C7_03850W,APN2,PRI2,ADA2,NUP84,C6_03380W
cell wall (GO:0005618)	9/375	56/1062	0.999705	1	9	RPS6A,WH11,C1_02330C,CR_08480C,RPL38,CRD2,CSP37,DSE1,PRT1
cell wall organization (GO:0071555)	4/375	35/1062	0.999748	1	4	YVH1,DSE1,PGA26,ADA2
response to chemical (GO:0042221)	35/375	151/1062	0.999811	1	35	CR_01260W,UTP20,OPT1,AHR1,MRT4,URE2,NIP1,C5_04530W,HNM1,C5_04910W,C7_03850W,C4_05230C,C1_11160C,MRR1,HAP41,RPL17B,SUT1,RRP6,ENP2,RPG1A,RPF2,PGA26,PRT1,C1_06760C,C4_05010W,RRS1,CCN1,ERB1,NOG1,ADA2,NOP14,DAG7,C3_05380W,RLP24,FET31
cell cycle (GO:0007049)	13/375	75/1062	0.999889	1	13	CAK1,YVH1,C5_04910W,C7_03850W,REI1,C4_05230C,SPC19,C3_07130W,ZPR1,DBF2,C1_06760C,CCN1,AMN1
hydrolase activity (GO:0016787)	27/375	126/1062	0.99989	1	27	CM_00340W,RPM2,SNU114,C2_08200W,C1_06390W,CM_00160C,C7_03400C,C1_12610W,C6_02380W,C6_04180W,C2_01860C,YVH1,SEN15,PPT1,C4_01730C,APN2,RRP6,SNQ2,C2_09970C,SGA1,TRM2,ELF1,TAF14,MSS116,C3_05160C,DBP3,C3_01560W
pathogenesis (GO:0009405)	11/375	68/1062	0.999914	1	11	FAD3,WH11,NUO1,AHR1,SRR1,YVH1,CSP37,DSE1,MNN4,PGA26,ADA2
cellular bud (GO:0005933)	2/375	28/1062	0.99993	1	2	DBF2,AMN1
cell cortex (GO:0005938)	2/375	31/1062	0.99998	1	2	C2_08160C,DBF2
extracellular region (GO:0005576)	6/375	53/1062	0.999989	1	6	CAM1,COI1,RPL17B,RPS42,DAG7,YNK1
interspecies interaction between organisms (GO:0044419)	12/375	89/1062	1	1	12	FAD3,WH11,NUO1,AHR1,ZCF1,SRR1,YVH1,CSP37,DSE1,MNN4,PGA26,ADA2
filamentous growth (GO:0030447)	18/375	118/1062	1	1	18	CR_01260W,EMP70,CSI2,RPB4,AHR1,SRR1,YVH1,ECM22,STP4,C1_11160C,DSE1,VRG4,SNQ2,PGA26,DBF2,CCN1,ADA2,ENP1
site of polarized growth (GO:0030427)	1/375	37/1062	1	1	1	DBF2
carbohydrate metabolic process (GO:0005975)	5/375	62/1062	1	1	5	GAL7,BMT1,C2_09970C,SGA1,RHD1
response to stress (GO:0006950)	20/375	157/1062	1	1	20	WH11,CSI2,RPB4,AHR1,SRR1,RTA3,C1_11160C,DSE1,C2_08160C,HAP41,APN2,ZPR1,SNQ2,PRI2,PGA26,RMS1,ADA2,NUP84,YNK1,ENP1

## Sheet: TE >=2-fold increased
GO term description	Gene ratio	Background ratio	p value	padj value	Gene count	Gene names
cellular respiration (GO:0045333)	10/175	21/1062	0.000774341	0.0557526	10	ALG6,CM_00320W,QCR8,CM_00330W,C1_03940W,C1_09440W,C2_03450W,CM_00370W,CM_00440W,CM_00030W
mitochondrial envelope (GO:0005740)	16/175	58/1062	0.0196083	0.51364	16	ISA2,CM_00320W,QCR8,YIM1,CM_00330W,C1_06640C,C6_00490W,C1_03940W,CM_00370W,CM_00170C,C3_01780C,CM_00440W,TIM9,CM_00140C,SAM51,CM_00030W
endomembrane system (GO:0012505)	23/175	93/1062	0.0214017	0.51364	23	ALG6,CR_06560C,C2_06620W,C2_09680W,C1_07590C,OST1,CYB5,C1_09840C,MLC1,GLE2,SYS1,NUP49,C4_05080C,CEK1,CWH8,FEN1,SPC2,AGP2,TPO5,C5_01410C,DIE2,C5_03120W,SSH1
lipid metabolic process (GO:0006629)	14/175	51/1062	0.0296521	0.533738	14	ALG6,CYB5,C6_00490W,C4_00950C,CR_01430W,FAD3,OPI3,CWH8,C7_02690C,C2_01660C,ERG251,FEN1,C2_07440C,C5_03120W
mitochondrion (GO:0005739)	28/175	124/1062	0.0377508	0.543611	28	ISA2,C5_03080C,CR_06560C,CM_00320W,YML6,QCR8,YIM1,CM_00330W,C1_06640C,C6_00490W,C1_03940W,C1_09440W,CM_00370W,CM_00170C,C3_01780C,CM_00440W,TIM9,YFH1,CM_00140C,SAM51,RPM2,C1_09390W,C1_02500W,MSU1,C4_03730C,C1_02290C,CM_00030W,C6_03210C
membrane (GO:0016020)	48/175	237/1062	0.0486293	0.583551	48	ALG6,C5_03080C,CM_00320W,C3_06950W,QCR8,CM_00340W,YIM1,CM_00330W,C2_09680W,PHO87,C1_07590C,OST1,C1_06640C,CYB5,C6_00490W,C1_03940W,RAX2,CM_00370W,CM_00170C,CM_00440W,C1_06510C,SSU81,C1_06270W,TIM9,YCF1,SYS1,C4_05080C,CM_00140C,C3_05280C,SAM51,SMF12,CWH8,C7_02690C,C3_00210C,ERG251,FEN1,SPC2,SKN1,AGP2,C2_07440C,CM_00030W,C2_02180W,C1_02410C,C5_01410C,DIE2,C5_03120W,SSH1,CR_01260W
generation of precursor metabolites and energy (GO:0006091)	12/175	48/1062	0.0811389	0.834572	12	ALG6,CM_00320W,QCR8,CM_00330W,C1_03940W,C1_09440W,C2_03450W,CM_00370W,CM_00440W,GLC3,CM_00030W,GPM2
isomerase activity (GO:0016853)	5/175	17/1062	0.132939	1	5	C1_07570C,PMM1,RBP1,C3_05550C,GPM2
ligase activity (GO:0016874)	4/175	13/1062	0.152048	1	4	PAN6,PRS,C3_05760W,C5_01590W
transporter activity (GO:0005215)	14/175	65/1062	0.16694	1	14	C5_03080C,PHO87,C1_06640C,OPT8,CM_00170C,C1_06510C,TIM9,YCF1,C4_05080C,CM_00140C,SMF12,TPO5,CM_00030W,C2_02180W
vitamin metabolic process (GO:0006766)	4/175	14/1062	0.186904	1	4	ISA2,C2_02700C,PAN6,C3_05760W
protein kinase activity (GO:0004672)	4/175	15/1062	0.224028	1	4	SSN3,GCN2,CAK1,CEK1
cellular protein modification process (GO:0006464)	17/175	89/1062	0.285451	1	17	ALG6,OST1,SSN3,MNN24,SWD2,CR_01430W,PTP1,LTP1,GCN2,CAK1,PTC8,CEK1,CWH8,C5_01590W,C3_05550C,DIE2,C5_03120W
phosphatase activity (GO:0016791)	4/175	17/1062	0.302828	1	4	PTP1,LTP1,PTC8,C4_00580W
transferase activity (GO:0016740)	29/175	160/1062	0.30606	1	29	C2_09070C,ALG6,YIM1,OST1,SSN3,MNN24,SAM4,C4_00950C,C3_05860C,SWD2,CR_01430W,RPC19,CM_00170C,ELC1,OPI3,GLC3,GCN2,CAK1,CM_00140C,CEK1,C4_00580W,C7_02690C,C1_01150C,C1_09390W,FEN1,CR_02890C,C4_03730C,C6_03210C,DIE2
cellular bud (GO:0005933)	6/175	28/1062	0.308466	1	6	C1_07590C,RAX2,MLC1,SSU81,C5_03170C,BEM1
vacuole (GO:0005773)	6/175	29/1062	0.340111	1	6	CR_06560C,C3_06950W,C1_06510C,YCF1,AGP2,C2_02180W
cell budding (GO:0007114)	3/175	13/1062	0.36463	1	3	C4_00950C,RAX2,BEM1
site of polarized growth (GO:0030427)	7/175	37/1062	0.410086	1	7	C1_07590C,RAX2,MLC1,SSU81,C5_03170C,BEM1,CEK1
endoplasmic reticulum (GO:0005783)	7/175	38/1062	0.439488	1	7	ALG6,CR_06560C,OST1,C4_05080C,FEN1,C5_03120W,SSH1
growth of unicellular organism as a thread of attached cells (GO:0070783)	3/175	15/1062	0.46037	1	3	PTP1,CEK1,CR_01260W
protein folding (GO:0006457)	3/175	15/1062	0.46037	1	3	C4_05860W,RBP1,C3_05550C
translation regulator activity (GO:0045182)	2/175	10/1062	0.509694	1	2	CAM1,GCN2
Golgi apparatus (GO:0005794)	3/175	17/1062	0.549476	1	3	C2_06620W,SYS1,TPO5
nucleotidyltransferase activity (GO:0016779)	3/175	17/1062	0.549476	1	3	RPC19,CR_02890C,C6_03210C
cytokinesis (GO:0000910)	2/175	11/1062	0.563696	1	2	RAX2,MLC1
nucleus organization (GO:0006997)	2/175	11/1062	0.563696	1	2	GLE2,FEN1
protein catabolic process (GO:0030163)	5/175	32/1062	0.62822	1	5	C1_09840C,CDC20,ELC1,C4_05860W,C2_01320W
transport (GO:0006810)	28/175	178/1062	0.652271	1	28	C5_03080C,C3_06970W,C2_06620W,C2_09680W,PHO87,C1_06640C,OPT8,CM_00170C,MLC1,C1_06510C,TIM9,GLE2,YCF1,SYS1,NUP49,C4_05080C,CM_00140C,PMM1,SAM51,SMF12,FEN1,SPC2,AGP2,TPO5,C2_02180W,C1_02410C,SSH1,CR_01260W
signal transduction (GO:0007165)	6/175	42/1062	0.716718	1	6	HMS1,CR_06560C,SSU81,GCN2,CEK1,RBP1
vesicle-mediated transport (GO:0016192)	6/175	42/1062	0.716718	1	6	C2_06620W,C2_09680W,MLC1,SYS1,FEN1,C1_02410C
cytoplasm (GO:0005737)	64/175	408/1062	0.736241	1	64	ISA2,ALG6,C5_03080C,CR_06560C,C2_05410W,CM_00320W,YML6,C3_06950W,QCR8,C3_06970W,C2_06620W,YIM1,CM_00330W,C2_09680W,C1_07590C,OST1,C1_06640C,C6_00490W,C1_03940W,C1_09440W,CM_00370W,CM_00170C,PRS,C3_01780C,CM_00440W,RPS27,MLC1,C1_06510C,C7_02660C,CAM1,TIM9,C3_05760W,GLE2,GCN2,YCF1,SYS1,YFH1,CAK1,C4_05080C,CM_00140C,C5_03170C,PMM1,C4_05860W,SAM51,DDC1,RPM2,C4_03740W,BEM1,CEK1,CR_09670C,C1_09390W,FEN…
cellular homeostasis (GO:0019725)	6/175	43/1062	0.738789	1	6	C3_06950W,YCF1,YFH1,SMF12,C2_02180W,CR_01260W
lipid binding (GO:0008289)	3/175	23/1062	0.758419	1	3	C1_09840C,CAM1,BEM1
hyphal growth (GO:0030448)	2/175	16/1062	0.769121	1	2	RAX2,BEM1
hydrolase activity (GO:0016787)	18/175	126/1062	0.796132	1	18	CM_00340W,YIM1,C6_00490W,C1_09440W,C4_00950C,C1_12440W,PTP1,LTP1,GLC3,RPM2,PTC8,C4_00580W,SNU114,CWH8,CR_09670C,SPC2,C2_07440C,MSU1
oxidoreductase activity (GO:0016491)	14/175	100/1062	0.798442	1	14	CM_00320W,QCR8,CM_00340W,YIM1,CM_00330W,CYB5,C1_03940W,CM_00370W,CM_00440W,FAD3,YFH1,C2_01660C,ERG251,CM_00030W
peptidase activity (GO:0008233)	2/175	19/1062	0.847308	1	2	YIM1,SPC2
plasma membrane (GO:0005886)	13/175	100/1062	0.871937	1	13	QCR8,PHO87,C1_07590C,OST1,C1_03940W,RAX2,C1_06510C,SSU81,SMF12,ERG251,SPC2,AGP2,SSH1
translation (GO:0006412)	6/175	52/1062	0.884271	1	6	C2_05410W,YML6,PRS,RPS27,CAM1,RPM2
organelle organization (GO:0006996)	24/175	175/1062	0.884557	1	24	C6_03420W,C2_09680W,C1_06640C,C1_12440W,C1_09840C,SWD2,ARC19,C3_01780C,RPS27,MLC1,TIM9,GLE2,YCF1,C1_03630W,SAM51,DDC1,RPM2,C4_03870C,C1_09390W,FEN1,RBP1,C3_00730W,C1_02500W,C1_02290C
RNA metabolic process (GO:0016070)	22/175	162/1062	0.885726	1	22	SSN3,C3_05860C,C1_12440W,SWD2,RPC19,CR_07030C,PRS,C1_07570C,PRP39,RPS27,C7_02660C,PRP45,RPM2,C4_03740W,SNU114,C1_01150C,C1_09390W,C3_00730W,CR_02890C,MSU1,C4_03730C,C6_03210C
chromosome (GO:0005694)	7/175	60/1062	0.891714	1	7	C6_03420W,CM_00330W,SSN3,C1_09840C,C1_03630W,DDC1,C4_03740W
enzyme regulator activity (GO:0030234)	3/175	31/1062	0.908355	1	3	CDC20,CAK1,DDC1
DNA metabolic process (GO:0006259)	5/175	47/1062	0.910591	1	5	C6_03420W,SWD2,ELC1,DDC1,C4_03870C
lyase activity (GO:0016829)	1/175	15/1062	0.934169	1	1	C2_02700C
cell development (GO:0048468)	1/175	16/1062	0.945172	1	1	CEK1
cell cycle (GO:0007049)	8/175	75/1062	0.948149	1	8	C6_03420W,RAX2,CDC20,MLC1,GCN2,CAK1,DDC1,CEK1
RNA binding (GO:0003723)	8/175	75/1062	0.948149	1	8	C1_07570C,PRP39,CAM1,GCN2,SNU114,C1_09390W,C3_00730W,MSU1
structural molecule activity (GO:0005198)	6/175	60/1062	0.949669	1	6	ISA2,C2_05410W,YML6,RPS27,NUP49,C2_01320W
cytoskeleton organization (GO:0007010)	2/175	28/1062	0.959709	1	2	ARC19,MLC1
cell cortex (GO:0005938)	2/175	31/1062	0.974732	1	2	MLC1,BEM1
cytoskeleton (GO:0005856)	2/175	31/1062	0.974732	1	2	ARC19,MLC1
protein binding (GO:0005515)	11/175	106/1062	0.977648	1	11	HMS1,C2_09680W,MED8,ARC19,MLC1,SSU81,CAM1,TIM9,C4_05860W,BEM1,C1_02290C
extracellular region (GO:0005576)	4/175	53/1062	0.984425	1	4	C7_02450W,CAM1,PMM1,RBP1
carbohydrate metabolic process (GO:0005975)	5/175	62/1062	0.984987	1	5	MNN24,GLC3,PMM1,SKN1,GPM2
cell wall organization (GO:0071555)	2/175	35/1062	0.986616	1	2	SSU81,CEK1
ribosome (GO:0005840)	4/175	57/1062	0.99101	1	4	C2_05410W,YML6,RPS27,GCN2
DNA binding (GO:0003677)	6/175	76/1062	0.992504	1	6	HMS1,CM_00340W,MED8,CAM1,CR_02890C,C6_03210C
response to drug (GO:0042493)	6/175	78/1062	0.994201	1	6	SSN3,ARC19,CEK1,RBP1,TPO5,CR_01260W
response to chemical (GO:0042221)	15/175	151/1062	0.995085	1	15	HMS1,CR_06560C,SSN3,C1_09840C,ARC19,SSU81,GCN2,YCF1,YFH1,C4_05860W,CEK1,CR_09670C,RBP1,TPO5,CR_01260W
pathogenesis (GO:0009405)	4/175	68/1062	0.998161	1	4	HMS1,FAD3,BEM1,CEK1
response to stress (GO:0006950)	14/175	157/1062	0.998902	1	14	HMS1,CR_06560C,YIM1,SSN3,C1_09840C,SSU81,ELC1,GCN2,YCF1,YFH1,C4_05860W,DDC1,PTC8,CEK1
biofilm formation (GO:0042710)	1/175	38/1062	0.999066	1	1	CAK1
filamentous growth (GO:0030447)	9/175	118/1062	0.999089	1	9	HMS1,RAX2,PTP1,SSU81,GCN2,PTC8,BEM1,CEK1,CR_01260W
nucleolus (GO:0005730)	4/175	75/1062	0.999363	1	4	C3_05860C,RPC19,CR_07030C,C1_09390W
nucleus (GO:0005634)	28/175	269/1062	0.999557	1	28	C6_03420W,CM_00330W,SSN3,MED8,C3_05860C,C1_09840C,SWD2,RPC19,CR_07030C,PRP39,CDC20,ELC1,CAM1,C3_05760W,GLE2,C2_05590C,PRP45,NUP49,C1_03630W,DDC1,RPM2,C4_03740W,CEK1,SNU114,C1_09390W,C2_01320W,CR_02890C,C6_03210C
cell wall (GO:0005618)	2/175	56/1062	0.999604	1	2	RAX2,GPM2
regulation of biological process (GO:0050789)	27/175	263/1062	0.999607	1	27	HMS1,CR_06560C,C6_03420W,PHO87,SSN3,MED8,ARC19,PTP1,CDC20,SSU81,CAM1,GLE2,GCN2,YCF1,CAK1,C4_05860W,DDC1,RPM2,C4_03740W,BEM1,CEK1,C4_03870C,C4_02770C,C1_09390W,RBP1,AGP2,C3_00730W
interspecies interaction between organisms (GO:0044419)	4/175	89/1062	0.999931	1	4	HMS1,FAD3,BEM1,CEK1
ribosome biogenesis (GO:0042254)	6/175	111/1062	0.999947	1	6	C3_05860C,C1_12440W,CR_07030C,RPS27,NUP49,C4_03740W

## Sheet: TE >=2-fold decreased
GO term description	Gene ratio	Background ratio	p value	padj value	Gene count	Gene names
DNA binding (GO:0003677)	22/110	76/1062	1.97003e-06	0.000137902	22	INO2,RRN3,ACE2,ORC4,C1_02310C,SKN7,RAD54,RTG3,C1_05270C,CR_03340C,SFL2,SFU1,DOT6,ZCF11,SMC5,C1_13880C,HMO1,MPH1,NDT80,BAS1,C4_00030C,LIG4
chromosome (GO:0005694)	15/110	60/1062	0.000642923	0.0225023	15	C6_02280W,C4_03170W,ORC4,C1_02310C,SKN7,C6_03950C,SFL2,NOP1,SMC5,HMO1,C1_02940C,MPH1,NDT80,C4_00030C,LIG4
DNA metabolic process (GO:0006259)	11/110	47/1062	0.00621248	0.144958	11	C4_03170W,ORC4,C1_02310C,RAD54,C1_05270C,CR_03340C,SMC5,DDR48,MPH1,C4_00030C,LIG4
nucleus (GO:0005634)	38/110	269/1062	0.0145606	0.205912	38	CR_07230W,C1_04990C,C6_02280W,NGG1,RRN3,HXK1,ACE2,ORC4,C1_02310C,C4_04520W,SKN7,C6_03950C,GAR1,RAD54,RTG3,C1_05270C,CR_03340C,CR_03330W,SFL2,CTA8,C3_04080W,LTV1,C3_02040C,ZCF11,NOP1,SMC5,HMO1,SPT20,C1_02940C,PUP1,MPH1,C2_10700C,NDT80,PUS4,BAS1,C2_00410C,C4_00030C,LIG4
regulation of biological process (GO:0050789)	37/110	263/1062	0.0173147	0.205912	37	INO2,C6_02280W,NGG1,C2_03780C,HXK1,BFR1,ACE2,ORC4,C1_02310C,C4_04520W,SKN7,CTA2,RAD54,RTG3,C1_05270C,CR_03340C,C3_03590W,CR_03330W,SFL2,PTC6,SFU1,CTA8,SOG2,C1_02440C,C3_02040C,DOT6,ZCF11,C1_13880C,HMO1,SPT20,CR_09230C,MPH1,C2_10700C,NDT80,BAS1,C4_00030C,PCL7
pathogenesis (GO:0009405)	13/110	68/1062	0.0176496	0.205912	13	ICL1,HWP1,DUR1,2,ECE1,HXK1,ACE2,SKN7,RTG3,SFL2,RBT1,SLK19,NDT80,LIG4
cell cycle (GO:0007049)	13/110	75/1062	0.0378037	0.378037	13	C6_02280W,BFR1,ACE2,ORC4,RAD54,CR_03340C,C6_02640C,SPS20,SMC5,CR_09230C,MPH1,NDT80,C4_00030C
organelle organization (GO:0006996)	24/110	175/1062	0.0754967	0.660596	24	CR_07230W,C3_06610W,NGG1,BFR1,ORC4,C1_02310C,C6_03950C,RAD54,RTG3,C1_05270C,CR_03340C,C3_03590W,CR_03620C,PTC6,C6_02640C,TAZ1,DOT6,NOP1,HMO1,SPT20,C1_02940C,C6_04250W,PAM16,C4_00030C
peroxisome (GO:0005777)	3/110	11/1062	0.0963229	0.749178	3	ICL1,C3_03590W,SPS20
interspecies interaction between organisms (GO:0044419)	13/110	89/1062	0.118878	0.832147	13	ICL1,HWP1,DUR1,2,ECE1,HXK1,ACE2,SKN7,RTG3,SFL2,RBT1,SLK19,NDT80,LIG4
ligase activity (GO:0016874)	3/110	13/1062	0.143643	0.914092	3	DUR1,2,GSH2,LIG4
response to stress (GO:0006950)	19/110	157/1062	0.257635	1	19	C4_03170W,GSH2,SKN7,C1_05270C,CR_03340C,PTC6,CTA8,CR_08990C,LTV1,SOG2,ZCF11,SMC5,DDR48,SPT20,MPH1,NDT80,C4_00030C,C2_07070W,LIG4
helicase activity (GO:0004386)	3/110	18/1062	0.283752	1	3	RAD54,MPH1,C2_00410C
response to chemical (GO:0042221)	18/110	151/1062	0.2893	1	18	GSH2,ACE2,SKN7,GAR1,RTG3,C1_05270C,PTC6,SFU1,CR_08990C,LTV1,SOG2,ZCF11,DDR48,SPT20,CR_09230C,OPT6,NDT80,C2_07070W
cell wall organization (GO:0071555)	5/110	35/1062	0.292506	1	5	HWP1,ACE2,SOG2,RBT1,SLK19
filamentous growth (GO:0030447)	14/110	118/1062	0.331208	1	14	HWP1,HXK1,ACE2,SKN7,SFL2,C3_05110W,SOG2,ZCF11,SMC5,DDR48,HMO1,NDT80,BAS1,LIG4
nucleolus (GO:0005730)	9/110	75/1062	0.371316	1	9	RRN3,C4_04520W,GAR1,C3_02040C,NOP1,HMO1,C2_10700C,C2_00410C,LIG4
cellular respiration (GO:0045333)	3/110	21/1062	0.373207	1	3	TAZ1,C3_04080W,GDS1
mitochondrial envelope (GO:0005740)	7/110	58/1062	0.394316	1	7	C3_03590W,CR_03620C,PTC6,TAZ1,C3_04080W,C6_04250W,PAM16
signal transduction (GO:0007165)	5/110	42/1062	0.443876	1	5	SKN7,RTG3,SOG2,ZCF11,SPT20
cell development (GO:0048468)	2/110	16/1062	0.506132	1	2	SKN7,SPS20
hyphal growth (GO:0030448)	2/110	16/1062	0.506132	1	2	HXK1,NDT80
isomerase activity (GO:0016853)	2/110	17/1062	0.539716	1	2	GAR1,PUS4
phosphatase activity (GO:0016791)	2/110	17/1062	0.539716	1	2	C2_03780C,PTC6
biofilm formation (GO:0042710)	4/110	38/1062	0.567309	1	4	HWP1,ECE1,ACE2,NDT80
cell adhesion (GO:0007155)	2/110	18/1062	0.571712	1	2	HWP1,ACE2
vacuole (GO:0005773)	3/110	29/1062	0.592919	1	3	PTC6,CR_08990C,LTV1
peptidase activity (GO:0008233)	2/110	19/1062	0.602085	1	2	C1_02440C,PUP1
RNA binding (GO:0003723)	7/110	75/1062	0.67835	1	7	C1_04990C,BFR1,GAR1,C3_02040C,NOP1,C5_00030W,C2_07070W
protein binding (GO:0005515)	10/110	106/1062	0.680455	1	10	CR_07230W,C6_02280W,C3_06610W,HWP1,RRN3,RTG3,ECM21,PAM16,BAS1,PCL7
nucleus organization (GO:0006997)	1/110	11/1062	0.701448	1	1	RAD54
response to drug (GO:0042493)	7/110	78/1062	0.719252	1	7	ACE2,SKN7,GAR1,LTV1,SOG2,OPT6,NDT80
generation of precursor metabolites and energy (GO:0006091)	4/110	48/1062	0.752562	1	4	HXK1,TAZ1,C3_04080W,GDS1
cell budding (GO:0007114)	1/110	13/1062	0.760699	1	1	SOG2
mitochondrion (GO:0005739)	11/110	124/1062	0.764184	1	11	HXK1,C1_05270C,C3_03590W,CR_03620C,PTC6,TAZ1,C3_04080W,C6_04250W,C5_00030W,PAM16,PUS4
hydrolase activity (GO:0016787)	11/110	126/1062	0.783059	1	11	C2_03780C,DUR1,2,ORC4,RAD54,PTC6,C1_02440C,SMC5,DDR48,PUP1,MPH1,C2_00410C
cellular bud (GO:0005933)	2/110	28/1062	0.805636	1	2	C3_06610W,SOG2
cytoskeleton organization (GO:0007010)	2/110	28/1062	0.805636	1	2	C3_06610W,C6_02640C
growth of unicellular organism as a thread of attached cells (GO:0070783)	1/110	15/1062	0.808276	1	1	SFL2
lyase activity (GO:0016829)	1/110	15/1062	0.808276	1	1	ICL1
protein folding (GO:0006457)	1/110	15/1062	0.808276	1	1	C3_03590W
cellular protein modification process (GO:0006464)	7/110	89/1062	0.83865	1	7	NGG1,C2_03780C,PTC6,C1_02440C,NOP1,SPT20,C2_10700C
Golgi apparatus (GO:0005794)	1/110	17/1062	0.846463	1	1	C6_02640C
cytoskeleton (GO:0005856)	2/110	31/1062	0.849542	1	2	C3_06610W,SOG2
cell wall (GO:0005618)	4/110	56/1062	0.852033	1	4	HWP1,ECE1,DDR48,RBT1
RNA metabolic process (GO:0016070)	13/110	162/1062	0.887362	1	13	C1_04990C,C3_07800C,RRN3,C4_04520W,SKN7,C2_03000C,GAR1,C3_02040C,NOP1,HMO1,PUS4,BAS1,C2_00410C
site of polarized growth (GO:0030427)	2/110	37/1062	0.911577	1	2	C3_06610W,SOG2
lipid metabolic process (GO:0006629)	3/110	51/1062	0.914775	1	3	ICL1,TAZ1,SPS20
endoplasmic reticulum (GO:0005783)	2/110	38/1062	0.919253	1	2	BFR1,CR_09230C
vesicle-mediated transport (GO:0016192)	2/110	42/1062	0.944157	1	2	C6_02640C,ECM21
cellular homeostasis (GO:0019725)	2/110	43/1062	0.949142	1	2	HXK1,SFU1
ribosome biogenesis (GO:0042254)	7/110	111/1062	0.957498	1	7	C3_07800C,C2_03000C,GAR1,LTV1,C3_02040C,NOP1,C2_00410C
oxidoreductase activity (GO:0016491)	6/110	100/1062	0.961236	1	6	C3_04080W,SPS20,C6_04250W,C2_07270W,C7_03200C,C2_07070W
carbohydrate metabolic process (GO:0005975)	3/110	62/1062	0.965886	1	3	ICL1,HXK1,RTG3
cell cortex (GO:0005938)	1/110	31/1062	0.967977	1	1	C3_06610W
enzyme regulator activity (GO:0030234)	1/110	31/1062	0.967977	1	1	C4_04520W
protein catabolic process (GO:0030163)	1/110	32/1062	0.971394	1	1	PUP1
extracellular region (GO:0005576)	2/110	53/1062	0.980526	1	2	ECE1,RBT1
ribosome (GO:0005840)	2/110	57/1062	0.986884	1	2	C1_05270C,C5_00030W
structural molecule activity (GO:0005198)	2/110	60/1062	0.990285	1	2	C1_05270C,C5_00030W
endomembrane system (GO:0012505)	4/110	93/1062	0.991936	1	4	BFR1,C6_02640C,LTV1,CR_09230C
transferase activity (GO:0016740)	8/110	160/1062	0.99707	1	8	NGG1,C4_03170W,HXK1,C2_03000C,TAZ1,NOP1,SMC5,C2_07070W
translation (GO:0006412)	1/110	52/1062	0.997077	1	1	C5_00030W
membrane (GO:0016020)	13/110	237/1062	0.999016	1	13	BFR1,C3_03590W,CR_03620C,PTC6,C6_02640C,TAZ1,C3_04080W,C3_05110W,CR_08990C,LTV1,C6_04250W,SLK19,PAM16
transporter activity (GO:0005215)	1/110	65/1062	0.999353	1	1	C6_04250W
cytoplasm (GO:0005737)	27/110	408/1062	0.999598	1	27	C3_06610W,ICL1,HXK1,BFR1,ACE2,SKN7,C6_03950C,C2_03000C,RTG3,C1_05270C,C3_03590W,CR_03620C,PTC6,C6_02640C,TAZ1,C3_04080W,CR_08990C,LTV1,SOG2,SPS20,HMO1,PUP1,C6_04250W,CR_09230C,C5_00030W,PAM16,PUS4
transport (GO:0006810)	7/110	178/1062	0.999812	1	7	HXK1,C6_02640C,LTV1,C3_02040C,ECM21,OPT6,PAM16
plasma membrane (GO:0005886)	2/110	100/1062	0.999861	1	2	CR_08990C,SLK19

## Sheet: Genes with uORF
GO term description	Gene ratio	Background ratio	p value	padj value	Gene count	Gene names
nucleus organization (GO:0006997)	2/410	11/1062	0.963732	1	2	PGA63,C2_08160C
growth of unicellular organism as a thread of attached cells (GO:0070783)	3/410	15/1062	0.966462	1	3	GLT1,SFL2,AHR1
cell budding (GO:0007114)	2/410	13/1062	0.984328	1	2	SOG2,ROT1
vitamin metabolic process (GO:0006766)	2/410	14/1062	0.989783	1	2	SPE1,SPE2
translation regulator activity (GO:0045182)	1/410	10/1062	0.992594	1	1	TIF5
lyase activity (GO:0016829)	2/410	15/1062	0.993371	1	2	SPE1,SPE2
enzyme regulator activity (GO:0030234)	6/410	31/1062	0.994377	1	6	DAP1,HGC1,CDC20,CR_02910W,GAC1,TIF5
nucleotidyltransferase activity (GO:0016779)	2/410	17/1062	0.997244	1	2	UGP1,RPB4
phosphatase activity (GO:0016791)	2/410	17/1062	0.997244	1	2	PTC8,AFL1
cell adhesion (GO:0007155)	2/410	18/1062	0.998232	1	2	PHR1,AHR1
ligase activity (GO:0016874)	1/410	13/1062	0.99832	1	1	CDC34
protein catabolic process (GO:0030163)	5/410	32/1062	0.998979	1	5	CDC20,CR_08650C,HRT1,CDC34,CDC4
cellular bud (GO:0005933)	4/410	28/1062	0.998983	1	4	PHR1,SOG2,WSC2,C7_03480W
protein folding (GO:0006457)	1/410	15/1062	0.999377	1	1	ROT1
protein kinase activity (GO:0004672)	1/410	15/1062	0.999377	1	1	HRK1
biofilm formation (GO:0042710)	6/410	38/1062	0.999535	1	6	HGC1,PHR1,NDT80,CZF1,TAF14,AHR1
cellular respiration (GO:0045333)	2/410	21/1062	0.999542	1	2	GDS1,C3_04080W
cell development (GO:0048468)	1/410	16/1062	0.999621	1	1	C1_10620W
hyphal growth (GO:0030448)	1/410	16/1062	0.999621	1	1	NDT80
cell wall organization (GO:0071555)	5/410	35/1062	0.999677	1	5	PHR1,SOG2,MSB2,SOD1,WSC2
Golgi apparatus (GO:0005794)	1/410	17/1062	0.99977	1	1	ARF2
isomerase activity (GO:0016853)	1/410	17/1062	0.99977	1	1	C1_10620W
generation of precursor metabolites and energy (GO:0006091)	8/410	48/1062	0.999803	1	8	GDS1,PFK2,GPH1,C3_04080W,GSY1,GAC1,UGP1,C2_09970C
translation (GO:0006412)	9/410	52/1062	0.999821	1	9	RPL21A,RPL11,RPL23A,RPS30,RPS27,C2_05710C,C1_03620C,TIF5,C1_02330C
cytoskeleton organization (GO:0007010)	3/410	28/1062	0.999832	1	3	ARC19,RHO2,ROT1
site of polarized growth (GO:0030427)	5/410	37/1062	0.999853	1	5	SOG2,MSB2,WSC2,RHO2,C7_03480W
signal transduction (GO:0007165)	6/410	42/1062	0.999898	1	6	SOG2,MSB2,WSC2,RHO2,HMS1,ARF2
peptidase activity (GO:0008233)	1/410	19/1062	0.999915	1	1	C6_03960W
cell cortex (GO:0005938)	3/410	31/1062	0.999955	1	3	C7_03480W,SEC10,C2_08160C
vesicle-mediated transport (GO:0016192)	5/410	42/1062	0.999981	1	5	CR_01770C,PGA63,SEC10,C2_08160C,C1_10620W
lipid binding (GO:0008289)	1/410	23/1062	0.999989	1	1	C7_03480W
structural molecule activity (GO:0005198)	9/410	60/1062	0.99999	1	9	PGA63,RPL21A,RPL11,RPL23A,RPS30,RPS27,C2_05710C,C1_03620C,C1_02330C
ribosome (GO:0005840)	8/410	57/1062	0.999993	1	8	RPL21A,RPL11,RPL23A,RPS30,RPS27,C2_05710C,C1_03620C,C1_02330C
cytoskeleton (GO:0005856)	2/410	31/1062	0.999996	1	2	ARC19,SOG2
endoplasmic reticulum (GO:0005783)	3/410	38/1062	0.999998	1	3	BFR1,C2_08160C,ROT1
cellular homeostasis (GO:0019725)	4/410	43/1062	0.999998	1	4	PFK2,SOD1,HRK1,GEF2
carbohydrate metabolic process (GO:0005975)	8/410	62/1062	0.999999	1	8	PHR1,PFK2,GPH1,GSY1,GAC1,AFL1,UGP1,C2_09970C
cell cycle (GO:0007049)	11/410	75/1062	0.999999	1	11	HGC1,CDC20,BFR1,NDT80,C4_07220C,PSF2,HRT1,CDC34,GAC1,BUB3,CDC4
vacuole (GO:0005773)	1/410	29/1062	0.999999	1	1	C3_06710W
chromosome (GO:0005694)	7/410	60/1062	1	1	7	NDT80,C4_07220C,PSF2,BUB3,SFL2,TAF14,C6_03380W
DNA binding (GO:0003677)	10/410	76/1062	1	1	10	BAS1,NDT80,C4_07220C,CZF1,RFX2,MNL1,HMS1,SFL2,AHR1,RPB4
cell wall (GO:0005618)	5/410	56/1062	1	1	5	PHR1,GPH1,UGP1,RPL23A,C1_02330C
DNA metabolic process (GO:0006259)	3/410	47/1062	1	1	3	C4_07220C,PSF2,C6_03380W
pathogenesis (GO:0009405)	7/410	68/1062	1	1	7	PHR1,NDT80,RFX2,SOD1,HMS1,SFL2,AHR1
response to drug (GO:0042493)	9/410	78/1062	1	1	9	ARC19,PHR1,NDT80,SOG2,MNL1,ARF2,IMH3,AHR1,FET31
filamentous growth (GO:0030447)	19/410	118/1062	1	1	19	PTC8,HGC1,PHR1,BAS1,NDT80,SOG2,MSB2,CZF1,RFX2,SOD1,C7_03480W,HMS1,GLT1,SFL2,CDC4,ARF2,IMH3,AHR1,RPB4
lipid metabolic process (GO:0006629)	3/410	51/1062	1	1	3	CWH8,DAP1,SUR2
RNA binding (GO:0003723)	8/410	75/1062	1	1	8	BFR1,PFK2,C6_02690C,RPB4,C1_10620W,C6_03380W,TIF5,C1_02330C
mitochondrial envelope (GO:0005740)	4/410	58/1062	1	1	4	TIM9,C3_04080W,SOD1,TIM23
extracellular region (GO:0005576)	3/410	53/1062	1	1	3	PHR1,MSB2,SOD1
transporter activity (GO:0005215)	5/410	65/1062	1	1	5	TIM9,C3_06710W,GEF2,TIM23,PHO87
protein binding (GO:0005515)	14/410	106/1062	1	1	14	TIM9,ARC19,BAS1,HRT1,GAC1,BUB3,PCL7,C7_03480W,HMS1,CDC4,AHR1,RPB4,TIF5,ROT1
cellular protein modification process (GO:0006464)	9/410	89/1062	1	1	9	CWH8,PTC8,CDC34,HRK1,CTM1,UGP1,CDC4,TAF14,ROT1
interspecies interaction between organisms (GO:0044419)	9/410	89/1062	1	1	9	HGC1,PHR1,NDT80,RFX2,SOD1,HMS1,SFL2,IMH3,AHR1
endomembrane system (GO:0012505)	9/410	93/1062	1	1	9	CWH8,DAP1,BFR1,SUR2,CR_08650C,PGA63,ARF2,C2_08160C,ROT1
oxidoreductase activity (GO:0016491)	10/410	100/1062	1	1	10	C3_04080W,SUR2,SOD1,MAE1,GLT1,C2_00400C,IMH3,C1_05190C,FRE10,FET31
plasma membrane (GO:0005886)	9/410	100/1062	1	1	9	PHR1,MSB2,GEF2,UGP1,C2_00400C,TIM23,FRE10,PHO87,FET31
cytoplasm (GO:0005737)	38/410	408/1062	1	1	38	TIM9,DAP1,HGC1,C4_06860C,BFR1,SOG2,PFK2,GPH1,C3_04080W,C4_07220C,HRT1,CDC34,SOD1,CTM1,CR_02910W,C3_06710W,GAC1,PGA63,C7_03480W,MAE1,SEC10,UGP1,RPL21A,ARF2,TIM23,IMH3,RPL11,RPL23A,C2_08160C,RPS27,C6_02690C,RPB4,C2_05710C,C6_03380W,TIF5,C1_05190C,ROT1,C1_02330C
hydrolase activity (GO:0016787)	10/410	126/1062	1	1	10	CWH8,PTC8,C4_06860C,PHR1,RHO2,AFL1,C6_03960W,ARF2,TAF14,C2_09970C
membrane (GO:0016020)	22/410	237/1062	1	1	22	TIM9,CWH8,PHR1,BFR1,MSB2,C3_04080W,SUR2,CR_08650C,CR_02910W,RHO2,C3_06710W,CR_01770C,GEF2,PGA63,UGP1,C2_00400C,TIM23,C2_08160C,ROT1,FRE10,PHO87,FET31
mitochondrion (GO:0005739)	7/410	124/1062	1	1	7	TIM9,PFK2,C3_04080W,SOD1,MAE1,TIM23,C1_05190C
nucleolus (GO:0005730)	1/410	75/1062	1	1	1	C1_10620W
nucleus (GO:0005634)	25/410	269/1062	1	1	25	HGC1,CDC20,C4_06860C,BAS1,NDT80,C3_04080W,C4_07220C,CR_08650C,PSF2,CZF1,HRT1,CDC34,SOD1,BUB3,SFL2,CDC4,RPL23A,C2_08160C,TAF14,C2_09970C,AHR1,C6_02690C,RPB4,C1_10620W,C6_03380W
organelle organization (GO:0006996)	16/410	175/1062	1	1	16	TIM9,ARC19,BFR1,C4_07220C,CR_02910W,RHO2,PGA63,TIM23,RPL11,C2_08160C,TAF14,RPS27,C6_02690C,C6_03380W,TIF5,ROT1
regulation of biological process (GO:0050789)	36/410	263/1062	1	1	36	ARC19,DAP1,HGC1,CDC20,BFR1,BAS1,NDT80,SOG2,MSB2,C4_07220C,CZF1,RFX2,SOD1,HRK1,WSC2,CR_02910W,RHO2,GAC1,BUB3,PCL7,C7_03480W,AFL1,MNL1,HMS1,SFL2,CDC4,ARF2,IMH3,TAF14,AHR1,C6_02690C,C7_03840W,RPB4,C6_03380W,TIF5,PHO87
response to chemical (GO:0042221)	14/410	151/1062	1	1	14	ARC19,HGC1,PHR1,NDT80,SOG2,CR_08650C,RFX2,SOD1,MNL1,HMS1,ARF2,IMH3,AHR1,FET31
response to stress (GO:0006950)	17/410	157/1062	1	1	17	PTC8,NDT80,SOG2,MSB2,C4_07220C,PSF2,CZF1,RFX2,SOD1,WSC2,GAC1,MNL1,HMS1,IMH3,C2_08160C,AHR1,RPB4
ribosome biogenesis (GO:0042254)	4/410	111/1062	1	1	4	RPL11,RPS27,C1_10620W,TIF5
RNA metabolic process (GO:0016070)	8/410	162/1062	1	1	8	BAS1,TAF14,RPS27,C6_02690C,C7_03840W,RPB4,C1_10620W,TIF5
transferase activity (GO:0016740)	13/410	160/1062	1	1	13	PHR1,PFK2,GPH1,CR_08650C,HRT1,CDC34,HRK1,CTM1,GSY1,AFL1,UGP1,CDC4,RPB4
transport (GO:0006810)	16/410	178/1062	1	1	16	TIM9,CR_02910W,RHO2,C3_06710W,CR_01770C,GEF2,PGA63,SEC10,ARF2,TIM23,C2_08160C,C2_09970C,RPB4,C1_10620W,FRE10,PHO87

## Sheet: Genes with pausing sites
GO term description	Gene ratio	Background ratio	p value	padj value	Gene count	Gene names
translation (GO:0006412)	2020-03-25	52/1062	0.1192	1	3	C1_03620C,C1_06070W,RPL11
ribosome (GO:0005840)	2020-03-25	57/1062	0.146184	1	3	C1_03620C,C1_06070W,RPL11
structural molecule activity (GO:0005198)	2020-03-25	60/1062	0.163308	1	3	C1_03620C,C1_06070W,RPL11
RNA binding (GO:0003723)	2020-01-25	75/1062	0.843201	1	1	PRP39
ribosome biogenesis (GO:0042254)	2020-01-25	111/1062	0.938787	1	1	RPL11
mitochondrion (GO:0005739)	2020-01-25	124/1062	0.956801	1	1	C1_06070W
RNA metabolic process (GO:0016070)	2020-01-25	162/1062	0.984847	1	1	PRP39
organelle organization (GO:0006996)	2020-01-25	175/1062	0.98952	1	1	RPL11
nucleus (GO:0005634)	2020-01-25	269/1062	0.999389	1	1	PRP39
cytoplasm (GO:0005737)	2020-02-25	408/1062	0.999922	1	2	C1_06070W,RPL11
